# Supplementary material
Source: Springer Nature journal article supplement (https://www.springermedizin.de/resource/supplementary/13063_2012_1203_MOESM1_ESM.pdf/9619868)
Supplement: MOESM1 [file 9619868]

## Appendix A. Participating institution

---

| No | Hospital Name                   | Principal Investigator |
|----|---------------------------------|------------------------|
| 1  | Ogaki Municipal Hospital        | Atsuyuki Maeda         |
| 2  | Tsushima City Hospital          | Satoru Kawai           |
| 3  | Chukyo Hospital                 | Yuichiro Tojima        |
| 4  | Tokai Municipal Hospital        | Yasuji Mokuno          |
| 5  | Chita City Hospital             | Masahiko Asano         |
| 6  | Nagoya University Hospital      | Keisuke Uehara         |
| 7  | Kasugai Municipal Hospital      | Akinori Sasamoto       |
| 8  | Nagoya Daini Red Cross Hospital | Eiji Sakamoto          |
| 9  | Toukai Hospital                 | Hideo Yamamoto         |
| 10 | Toyota Kosei Hospital           | Satoshi Kobayashi      |
| 11 | Anjo Kosei Hospital             | Hidenari Goto          |
| 12 | Toyohashi Municipal Hospital    | Kazuhiro Hiramatsu     |
| 13 | Fukuroi Municipal Hospital      | Takanori Kyokane       |

---
